# Supplementary material for: Michael addition-driven synthesis of cytotoxic palladium(ii) complexes from chromone thiosemicarbazones: investigation of anticancer activity throughin vitroandin vivostudies
Source: Royal Society of Chemistry journal article supplement (doi:10.1039/d3nj02067c), 2023-01-01
Supplement: d3nj02067c1.pdf [file d3nj02067c1.pdf]

## **Michael addition-driven synthesis of cytotoxic palladium(II) complexes from chromone thiosemicarbazones: Investigation of anticancer activity through *in vitro* and *in vivo* studies**

Jebiti Haribabu,<sup>a,\*</sup> Nithya Balakrishnan,<sup>b</sup> Srividya Swaminathan,<sup>c</sup> Dorothy Priyanka Dorairaj,<sup>b</sup> Mohammad Azam,<sup>d</sup> Mohamed Kasim Mohamed Subarkhan,<sup>e</sup> Yu-Lun Chang,<sup>f</sup> Sodio C. N. Hsu,<sup>f,g</sup> Pavel Štarha,<sup>h</sup> Ramasamy Karvembu<sup>b,\*</sup>

<sup>a</sup>*Facultad de Medicina, Universidad de Atacama, Los Carreras 1579, 1532502 Copiapo, Chile*

<sup>b</sup>*Department of Chemistry, National Institute of Technology, Tiruchirappalli 620015, India*

<sup>c</sup>*Center for Computational Modeling, Chennai Institute of Technology (CIT), Chennai 600069, India*

<sup>d</sup>*Department of Chemistry, College of Science, King Saud University, Riyadh 11451, Saudi Arabia*

<sup>e</sup>*The First Affiliated Hospital, Key Laboratory of Combined Multi-Organ Transplantation, Ministry of Public Health, School of Medicine, Zhejiang University, Hangzhou, 310003, PR China*

<sup>f</sup>*Department of Medicinal and Applied Chemistry, Drug Development and Value Creation Research Centre, Kaohsiung Medical University, Kaohsiung 80708, Taiwan*

<sup>g</sup>*Department of Medical Research, Kaohsiung Medical University Hospital; Department of Biotechnology, Kaohsiung Medical University, Kaohsiung 80708, Taiwan*

<sup>h</sup>*Department of Inorganic Chemistry, Faculty of Science, Palacky University Olomouc, 17 Listopadu 12, 77146 Olomouc, Czech Republic*

*Corresponding authors E-mail id: [haribabusiri970@gmail.com](mailto:haribabusiri970@gmail.com) (J.H.), [kar@nitt.edu](mailto:kar@nitt.edu) (R.K.)*

## Table of contents

|                                                                                                                                                                   |     |
|-------------------------------------------------------------------------------------------------------------------------------------------------------------------|-----|
| Materials and methods                                                                                                                                             | S3  |
| <b>Scheme S1.</b> Proposed mechanism for the formation of new Pd(II) complexes <b>1</b> and <b>2</b> based on previously reported mechanism for complex <b>3</b>  | S3  |
| Results and discussion                                                                                                                                            | S4  |
| <b>Fig. S1</b> UV-Visible spectra of the complexes.                                                                                                               | S4  |
| <b>Fig. S2</b> FT-IR spectrum of complex <b>1</b> .                                                                                                               | S5  |
| <b>Fig. S3</b> FT-IR spectrum of complex <b>2</b> .                                                                                                               | S5  |
| <b>Fig. S4</b> $^1\text{H}$ NMR spectrum (500 MHz) of complex <b>1</b> in $\text{CDCl}_3$                                                                         | S6  |
| <b>Fig. S5</b> $^{13}\text{C}\{^1\text{H}\}$ NMR spectrum (125 MHz) of complex <b>1</b> in $\text{CDCl}_3$                                                        | S6  |
| <b>Fig. S6</b> DEPT-135 NMR spectrum (125 MHz) of complex <b>1</b> in $\text{CDCl}_3$                                                                             | S7  |
| <b>Fig. S7</b> $^{31}\text{P}\{^1\text{H}\}$ NMR spectrum (202 MHz) of complex <b>1</b> in $\text{CDCl}_3$                                                        | S7  |
| <b>Fig. S8</b> $^1\text{H}$ NMR spectrum (500 MHz) of complex <b>2</b> in $\text{CDCl}_3$                                                                         | S8  |
| <b>Fig. S9</b> $^{13}\text{C}\{^1\text{H}\}$ NMR spectrum (125 MHz) of complex <b>2</b> in $\text{CDCl}_3$                                                        | S8  |
| <b>Fig. S10</b> DEPT-135 NMR spectrum (125 MHz) of complex <b>2</b> in $\text{CDCl}_3$                                                                            | S9  |
| <b>Fig. S11</b> $^{31}\text{P}\{^1\text{H}\}$ NMR spectrum (202 MHz) of complex <b>2</b> in $\text{CDCl}_3$                                                       | S9  |
| <b>Fig. S12</b> Effect of Pd(II) complexes <b>1-3</b> and cisplatin against normal (Vero) cells. Data were calculated by mean $\pm$ S.D. with three replications. | S10 |
| References                                                                                                                                                        | S10 |

## Materials and methods

Chemicals obtained from commercial suppliers were used as received and were of analytical grade. The melting points were measured on a Lab India instrument and are uncorrected. Elemental analyses were carried out using a PerkinElmer instrument. FT-IR spectra were obtained as KBr pellets using a Nicolet-iS5 spectrophotometer. UV-Visible spectra were recorded using a Shimadzu-2600 spectrophotometer. NMR spectra were recorded in deuterated chloroform by using TMS as an internal standard on a Bruker 500 MHz spectrometer. X-ray diffraction data collection and corrections for complex **3** were done at 113(2) K with an APEX  $K_{\alpha}$  diffractometer using graphite monochromated  $\text{MoK}_{\alpha}$  ( $k = 0.71073 \text{ \AA}$ ) radiation. The structural solution was obtained readily using XT/XS in APEX2<sup>1,2</sup> and refined by full matrix least squares on  $F^2$  using Olex2. The used (2*E*)-2-[(4-oxo-4*H*-chromen-3-yl)methylidene]hydrazinocarbothioamide-based chromone TSCs, bearing the terminal methyl (SVSHL1), phenyl (SVSHL2) or cyclohexyl (SVSHL3) substituent, were prepared according the formerly reported method.<sup>3</sup>

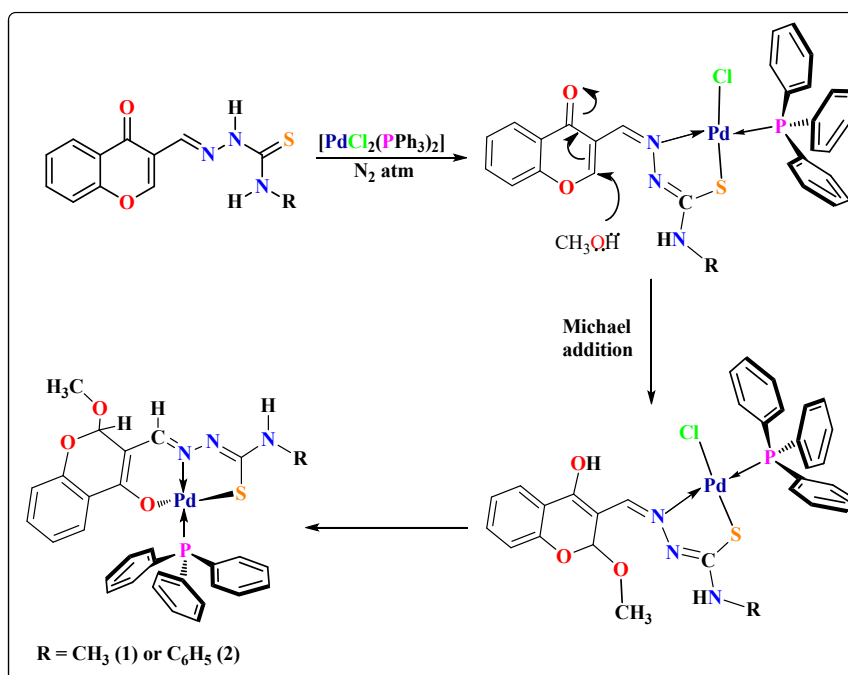

**Scheme S1.** Proposed mechanism for the formation of new Pd(II) complexes **1** and **2** based on previously reported mechanism for complex **3**.<sup>3</sup>

## Results and discussion

### Preliminary characterization using UV-Visible and FT-IR spectroscopy

UV-Visible spectra of the complexes were recorded in the wavelength range of 200-800 nm in DMSO. The absorption bands at 257 and 272 nm for complex **1** and 259 and 273 nm for complex **2** were specified to  $\pi \rightarrow \pi^*$  and  $n \rightarrow \pi^*$  transitions, respectively.<sup>4-6</sup> Complex **1** exhibited ligand to metal charge transfer transitions (LMCT) in the regions 368 and 381 nm. Similarly, the bands at 365 and 386 nm for complex **2** were related to LMCT.<sup>4</sup> FT-IR spectra of complexes **1** and **2** showed terminal N-H stretching frequency at 3365 or 3368  $\text{cm}^{-1}$ , respectively. The complexes showed an absorption band at 1480  $\text{cm}^{-1}$  due to the azomethine group. The bands at 1330 and 1332  $\text{cm}^{-1}$  in the spectra of complexes **1** and **2**, respectively, were assigned to  $\nu(\text{C-O})$ . A band due to  $\nu(\text{C-S})$  was observed at 1171 (**1**) or 1174 (**2**)  $\text{cm}^{-1}$ . In addition, a band appeared at 1574 (**1**) or 1573 (**2**)  $\text{cm}^{-1}$  was assigned to  $\nu(\text{C=C-O})$ . The presence of  $\text{PPh}_3$  in the complexes was confirmed by the appearance of bands at 1434, 1095 and 760  $\text{cm}^{-1}$ .<sup>4,6</sup>

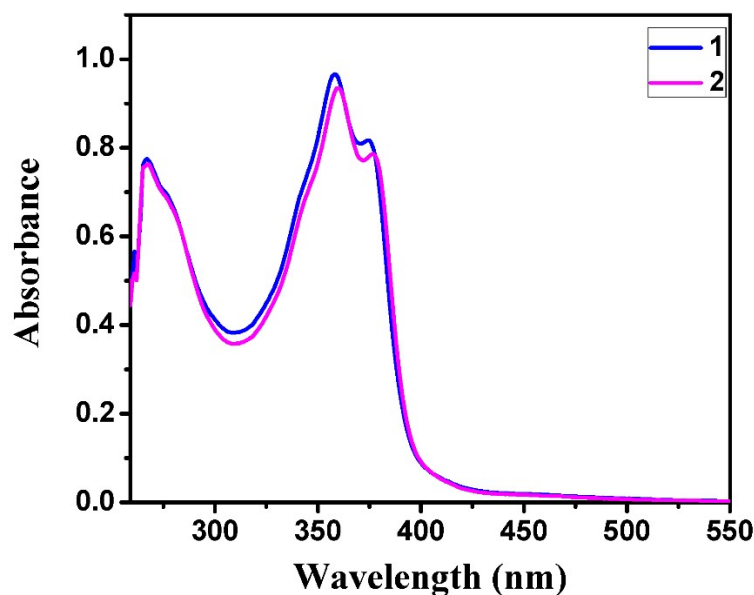

Fig. S1 UV-Visible spectra of the complexes.

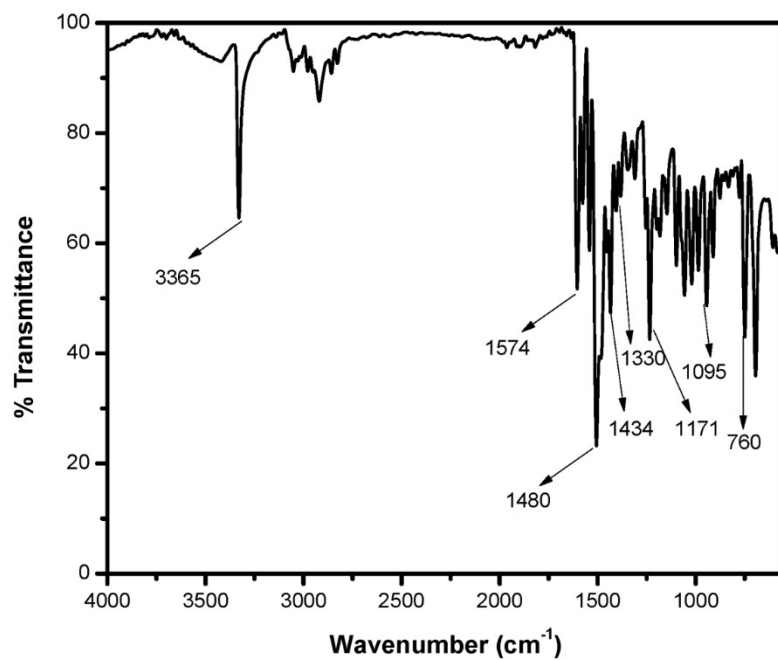

**Fig. S2** FT-IR spectrum of complex 1.

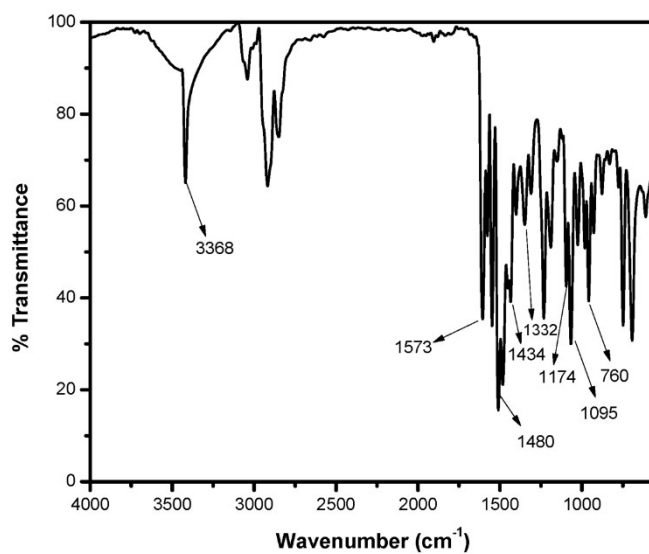

**Fig. S3** FT-IR spectrum of complex 2.

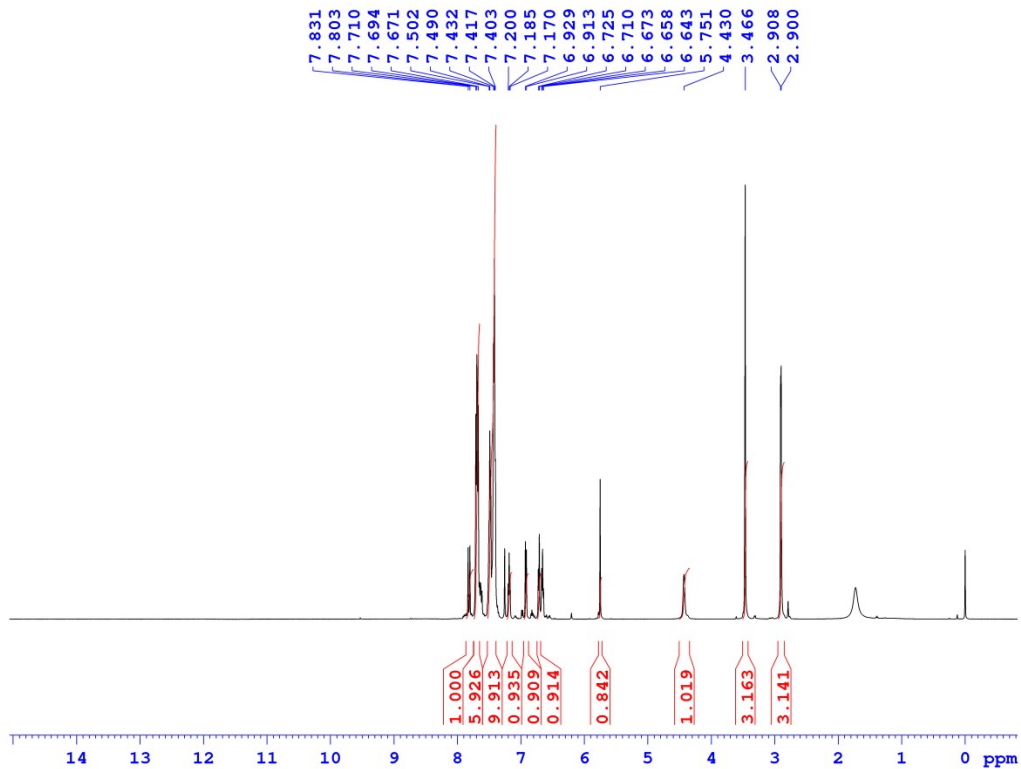

Fig. S4  $^1\text{H}$  NMR spectrum (500 MHz) of complex **1** in  $\text{CDCl}_3$ .

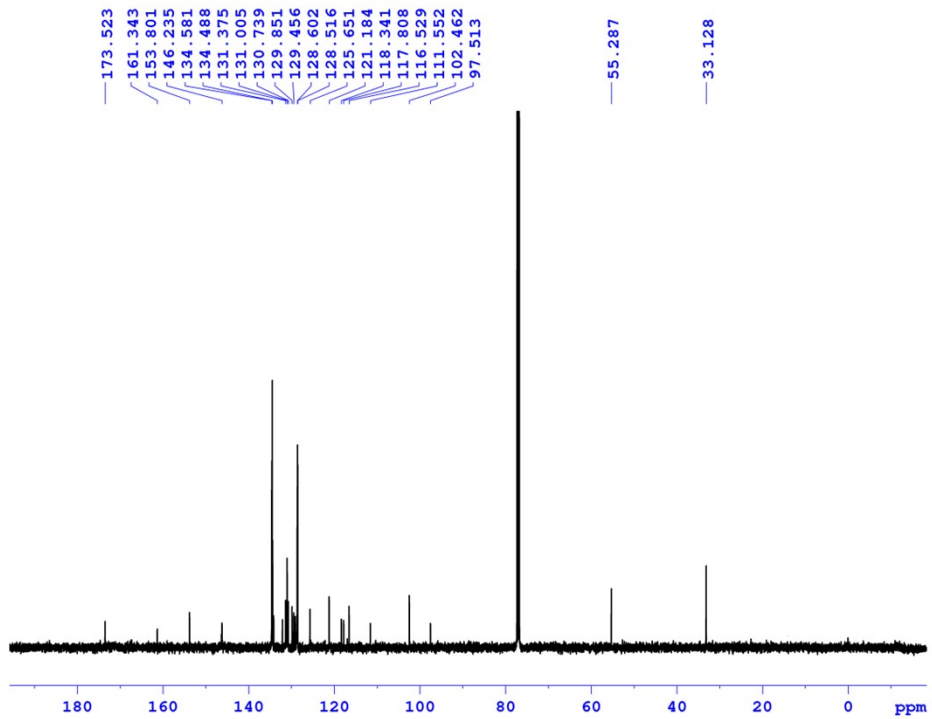

Fig. S5  $^{13}\text{C}\{^1\text{H}\}$  NMR spectrum (125 MHz) of complex **1** in  $\text{CDCl}_3$ .

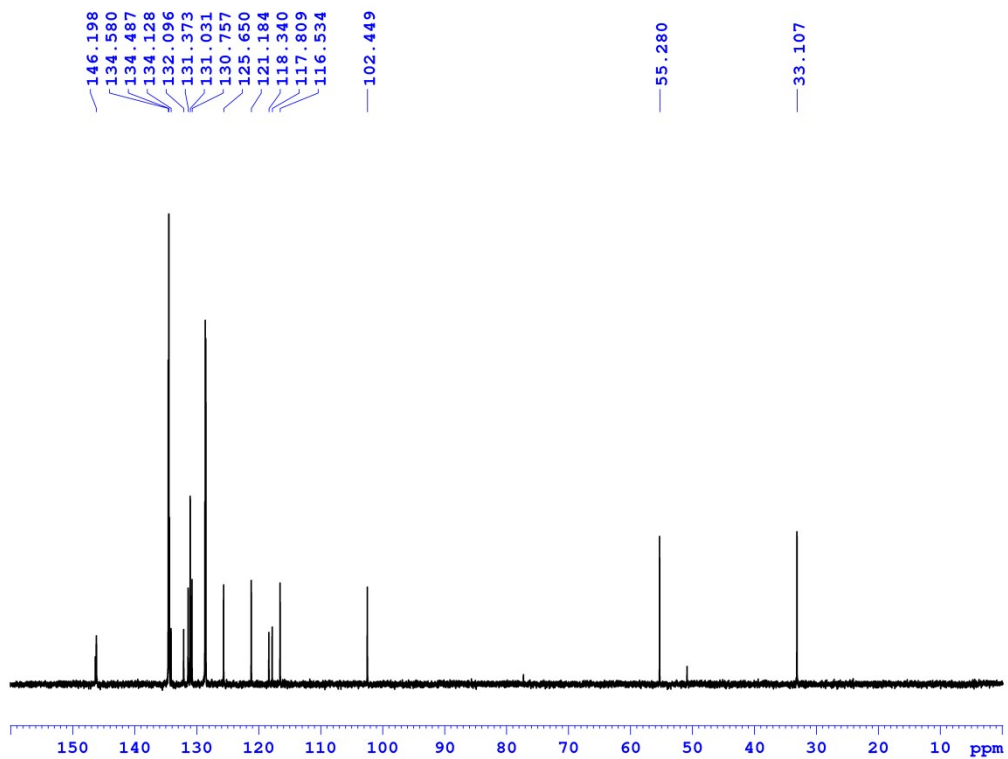

Fig. S6 DEPT-135 NMR spectrum (125 MHz) of complex **1** in  $\text{CDCl}_3$ .

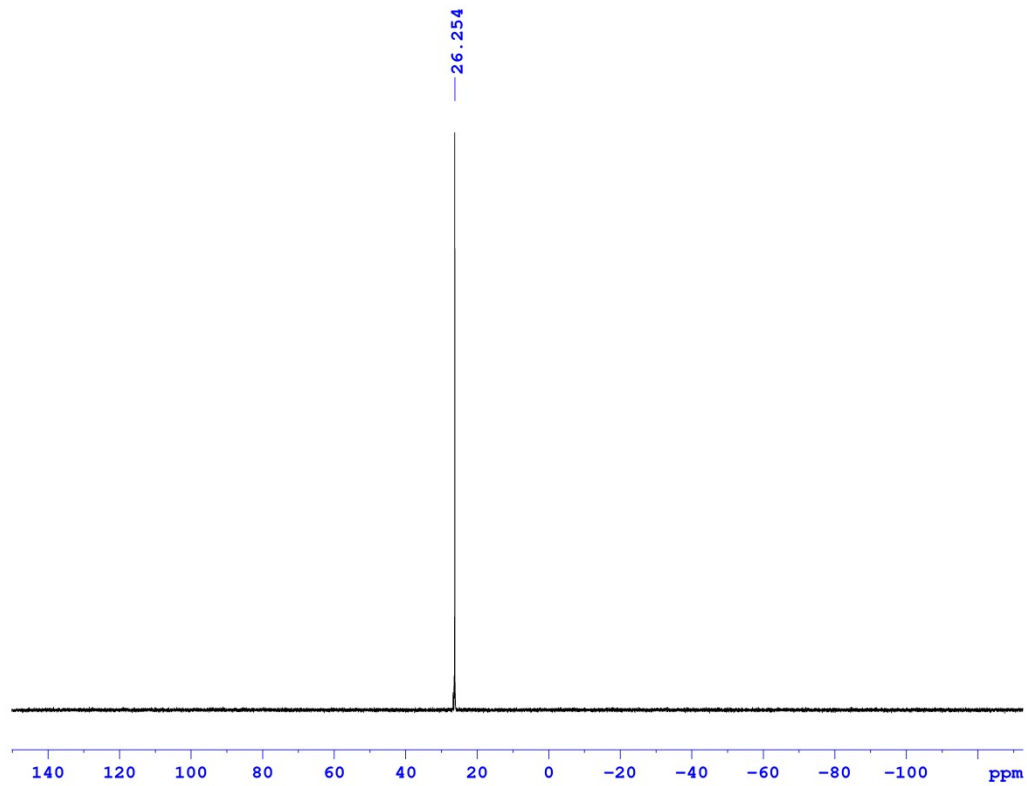

Fig. S7  $^{31}\text{P}\{^1\text{H}\}$  NMR spectrum (202 MHz) of complex **1** in  $\text{CDCl}_3$ .

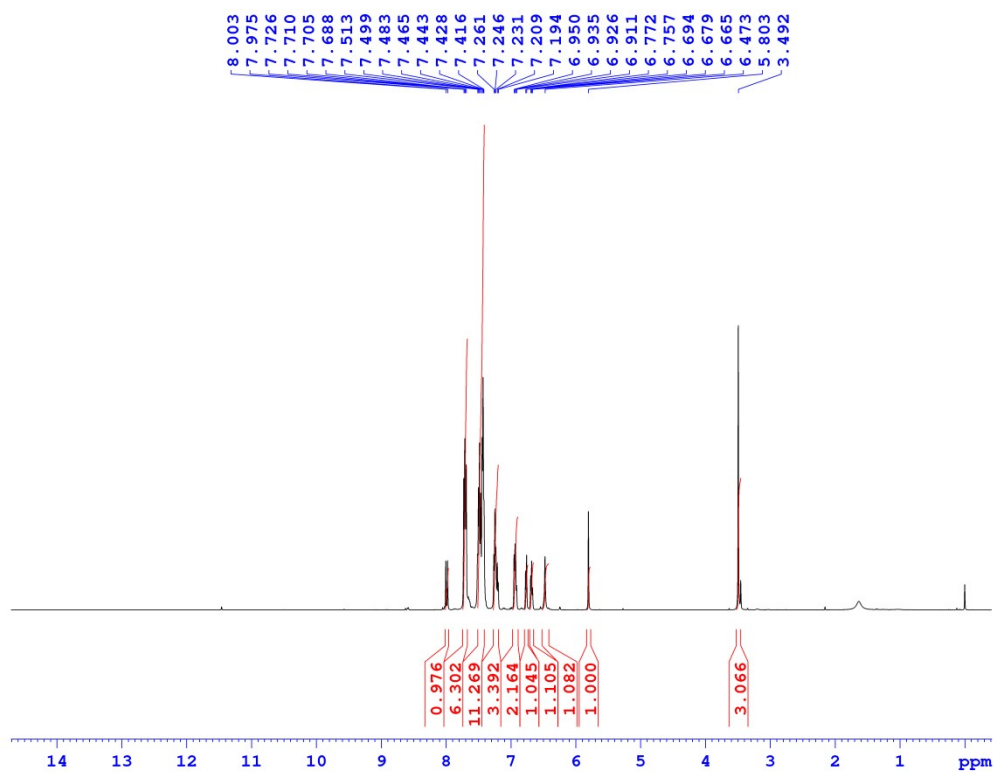

**Fig. S8**  $^1\text{H}$  NMR spectrum (500 MHz) of complex **2** in  $\text{CDCl}_3$ .

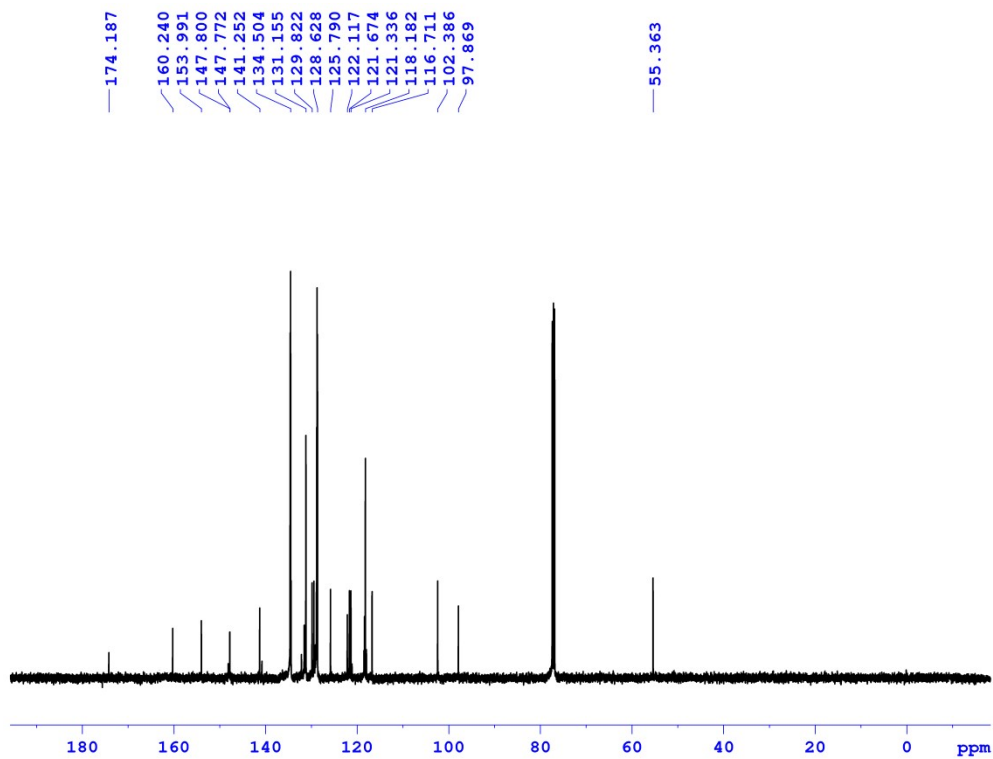

**Fig. S9**  $^{13}\text{C}\{^1\text{H}\}$  NMR spectrum (125 MHz) of complex **2** in  $\text{CDCl}_3$ .



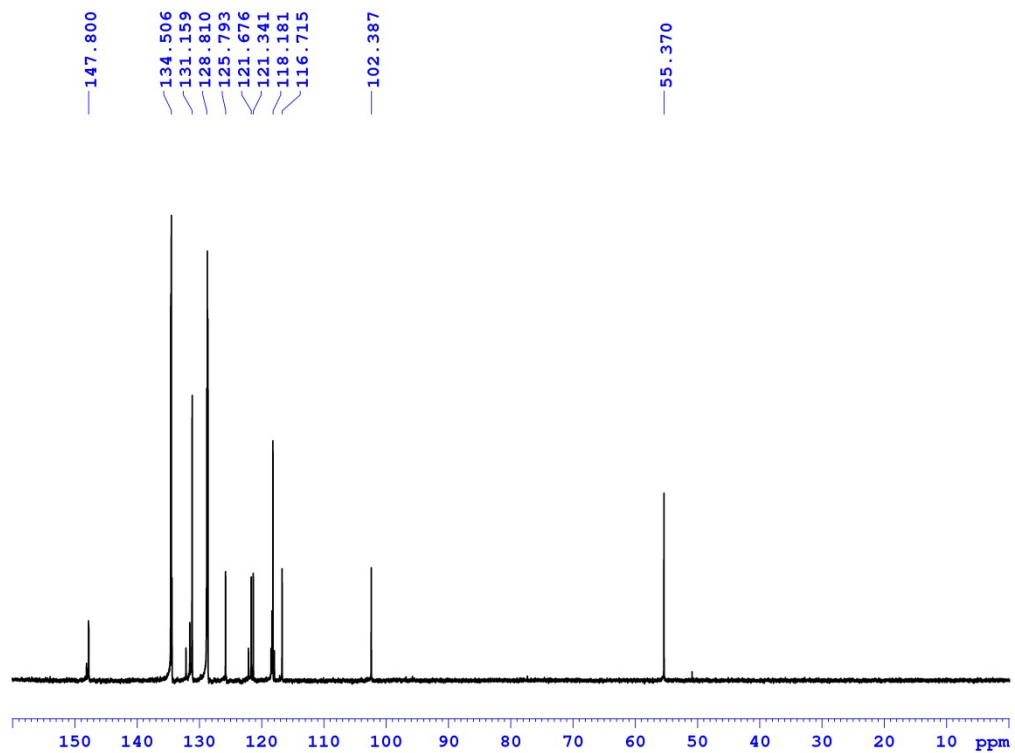

**Fig. S10** DEPT-135 NMR spectrum (125 MHz) of complex **2** in CDCl<sub>3</sub>.

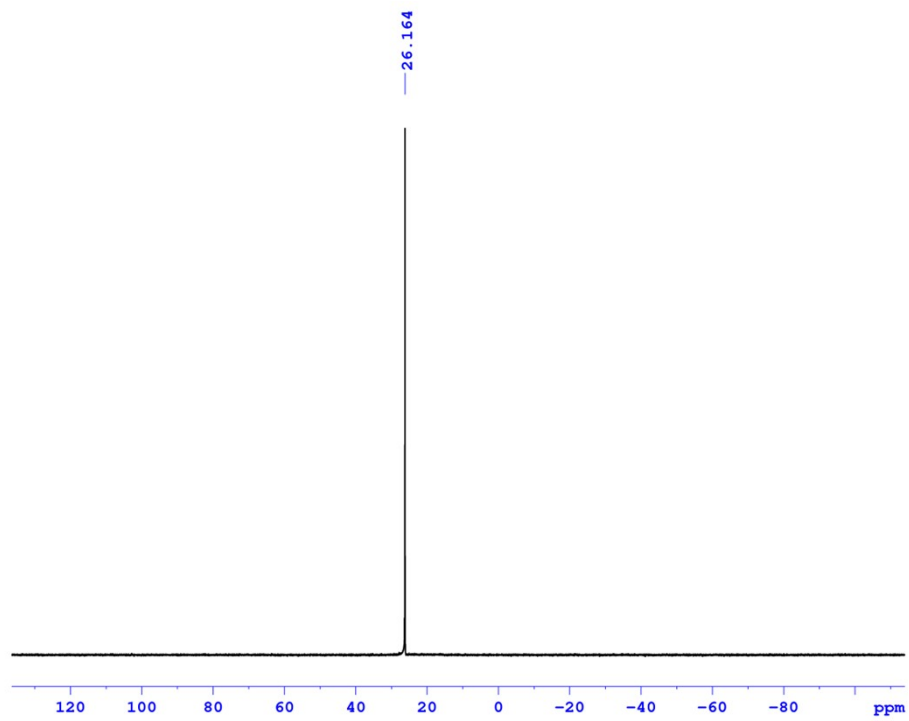

**Fig. S11** <sup>31</sup>P{<sup>1</sup>H} NMR spectrum (202 MHz) of complex **2** in CDCl<sub>3</sub>.

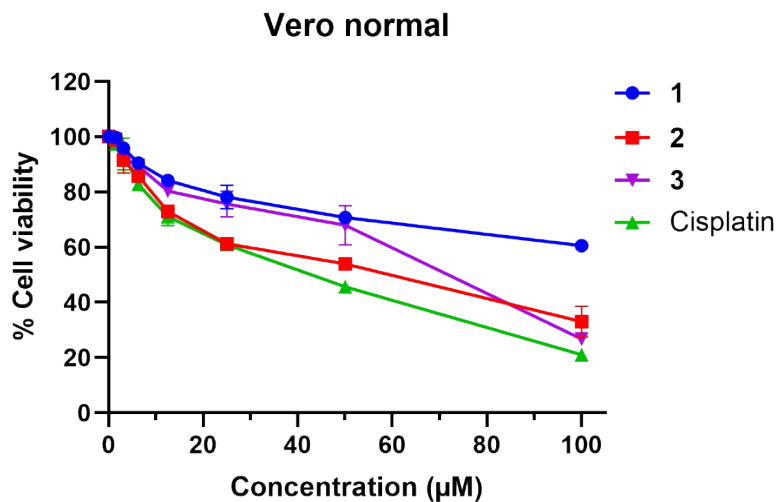

**Fig. S12** Effect of Pd(II) complexes **1-3** and cisplatin against normal (Vero) cells. Data were calculated by mean  $\pm$  S.D. with three replications.

## References

1. APEX2 “*Program for Data Collection and Integration on Area Detectors*”, Bruker AXS Inc., 5465 East Cheryl Parkway, Madison, WI 53711–5373, USA.
2. Sheldrick, G. M. “*TWINABS (version 2008/1): Program for Absorption Correction for Data from Area Detector Frames*”, University of Göttingen, 2008.
3. J. Haribabu, S. Srividya, D. Mahendiran, D. Gayathri, V. Venkatramu, N. Bhuvanesh and R. Karvembu, *Inorg. Chem.*, 2020, **59**, 17109–17122.
4. N. Balakrishnan, J. Haribabu, A. K. Dhanabalan, S. Swaminathan, S. Sun, D. F. Dibwe, N. Bhuvanesh, S. Awale and R. Karvembu, *Dalton Trans.*, 2020, **49**, 9411–9424.
5. J. Haribabu, C. Balachandran, M. M. Tamizh, Y. Arun, N. S. P. Bhuvanesh, S. Aoki and R. Karvembu, *J. Inorg. Biochem.*, 2020, **205**, 110988.
6. A. Shanmugapriya, R. Jain, D. Sabarinathan, G. Kalaiarasi, F. Dallemer and R. Prabhakaran, *New J. Chem.*, 2017, **41**, 10324–10338.
